# Supplementary material
Source: PubMed Central journal article supplement (PMC3985476)

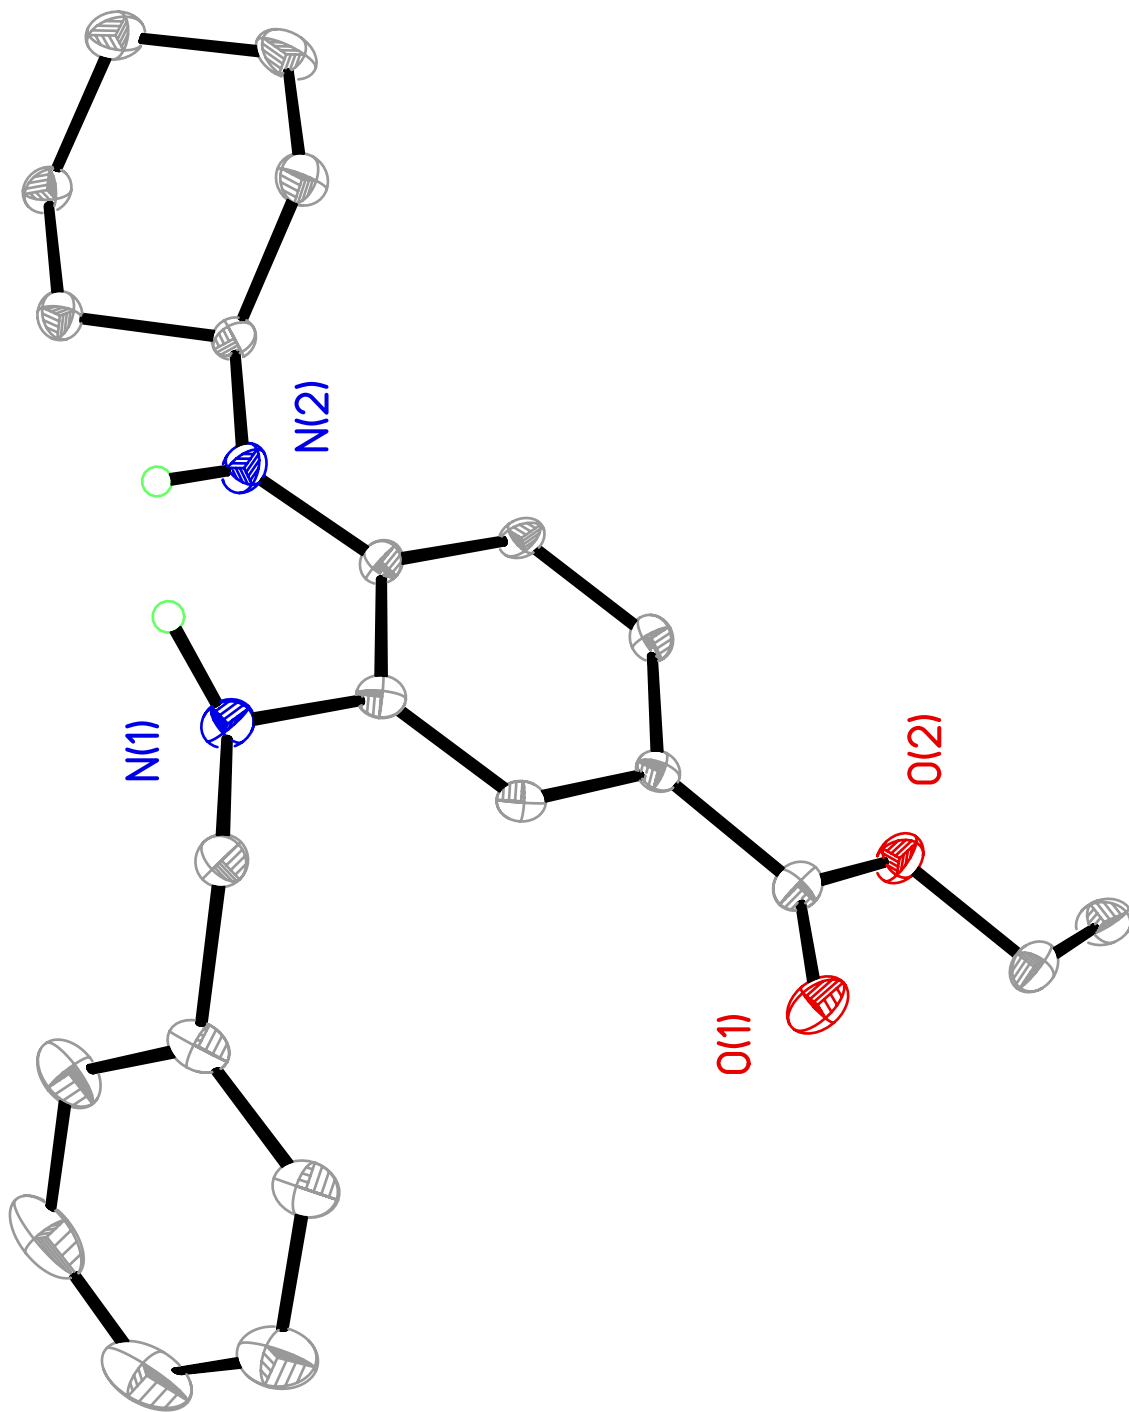

Supplement: ja411006a_si_004.pdf [file ja411006a_si_004.pdf]
